# Supplementary material
Source: PubMed Central journal article supplement (PMC7964535)
Supplement: 3857_materials.pdf [file 3857_materials.pdf]

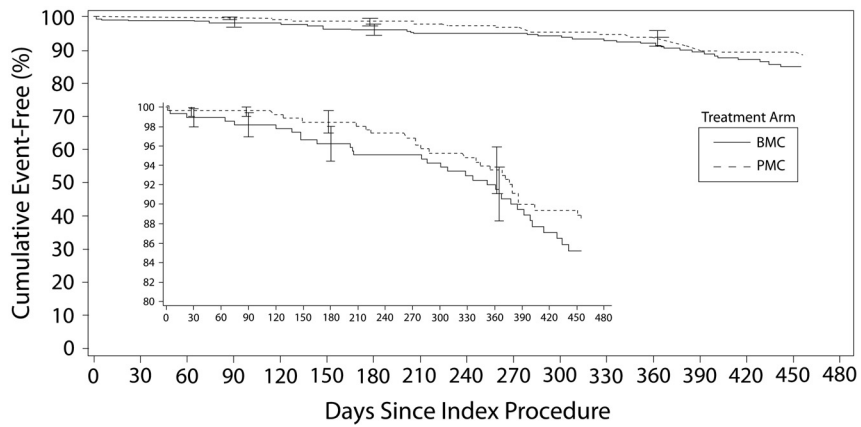

**ON-LINE FIG 1.** Kaplan-Meier curve showing freedom from TAR to 455 days, per protocol population ( $n = 568$ ).

**On-line Table 1. No. of patients treated by investigator**

| Clinical Site                                             | GDC | Matrix | Total |
|-----------------------------------------------------------|-----|--------|-------|
| Oregon Health and Science University                      | 30  | 30     | 60    |
| Hospital General Universitario de Alicante                | 23  | 24     | 47    |
| Hospital Donostia                                         | 18  | 21     | 39    |
| University of Massachusetts Worcester                     | 18  | 17     | 35    |
| CHRU Gui de Chauliac                                      | 15  | 17     | 32    |
| The University of Iowa Hospital and Clinics               | 17  | 15     | 32    |
| Montreal Neurological Institute                           | 15  | 16     | 31    |
| Medical University of South Carolina                      | 16  | 14     | 30    |
| St. Joseph's Hospital                                     | 14  | 13     | 27    |
| Chicago Institute of Neurosurgery and Neuroresearch       | 11  | 10     | 21    |
| St. Joseph's Hospital Barrow Neurological Institute       | 11  | 10     | 21    |
| Fort Sanders Regional Center                              | 10  | 10     | 20    |
| The Walton Centre                                         | 9   | 9      | 18    |
| Massachusetts General Hospital                            | 9   | 8      | 17    |
| Xuan Wu Hospital                                          | 9   | 7      | 16    |
| Newcastle General Hospital                                | 7   | 8      | 15    |
| Barnes Jewish Hospital                                    | 7   | 7      | 14    |
| University of Maryland                                    | 7   | 7      | 14    |
| Providence Hospital and Medical Centers                   | 6   | 5      | 11    |
| Rikshospitalet University Hospital                        | 5   | 6      | 11    |
| Istanbul University Cerrahpasa                            | 6   | 4      | 10    |
| Sacred Heart Medical Center                               | 5   | 5      | 10    |
| Methodist Hospital                                        | 5   | 4      | 9     |
| Tucson Medical Center                                     | 5   | 4      | 9     |
| Universitaetsklinikum des Saarlandes                      | 5   | 4      | 9     |
| University of Wisconsin-Madison                           | 3   | 5      | 8     |
| University of Washington Harborview Medical Center        | 3   | 4      | 7     |
| Carolina Neurosurgery and Spine Associates-PA             | 3   | 3      | 6     |
| Universitaetsklinikum Freiburg                            | 2   | 4      | 6     |
| Asklepios Klinik Altona                                   | 2   | 3      | 5     |
| Mercy Health Center                                       | 2   | 3      | 5     |
| University of New Mexico Health Sciences Center           | 3   | 2      | 5     |
| Royal Melbourne Hospital                                  | 3   | 1      | 4     |
| Instituto Nacional de Neurología y Neurocirugía           | 2   | 1      | 3     |
| Klinikum Augsburg Stenglinstrasse 2                       | 1   | 2      | 3     |
| Stony Brook University Medical Center                     | 2   | 1      | 3     |
| Sunrise Hospital and Medical Center                       | 0   | 3      | 3     |
| Clinica de Nuestra Señora del Rosario Ruber Internacional | 2   | 0      | 2     |
| Hospital Clinic i Provincial de Barcelona                 | 1   | 1      | 2     |
| University of Texas Southwestern Medical Center           | 1   | 1      | 2     |
| Yale University-New Haven Hospital                        | 1   | 1      | 2     |
| Cleveland Clinic Foundation                               | 0   | 1      | 1     |
| Saint Luke's Hospital-Kansas City-Missouri                | 1   | 0      | 1     |
| Total                                                     | 315 | 311    | 626   |

**Note:**—GDC indicates Guglielmi detachable coil; CHRU, Centre Hospitalier Régional Universitaire.

**On-line Table 2. Target aneurysm assessment before the procedure<sup>a</sup>**

|                                      | BMC (n = 315) | PMC (n = 311) | Relative Risk (95% CI) | Difference (95% CI) | P Value |
|--------------------------------------|---------------|---------------|------------------------|---------------------|---------|
| Target aneurysm location (anterior)  | 273 (86.7%)   | 270 (86.8%)   | 1.00 (0.94–1.06)       | −0.2% (−5.5–5.2)    | .9559   |
| Rupture status (ruptured)            | 119 (37.8%)   | 109 (35.0%)   | 1.08 (0.88–1.33)       | 2.7% (−4.8–10.3)    | .4780   |
| Aneurysm size <sup>b</sup> (mm)      | 7.6 ± 3.1     | 7.5 ± 3.0     | NA                     | 0.0 (−0.4–0.5)      | .8637   |
| Aneurysm size <sup>b</sup> of ≥10 mm | 68 (21.6%)    | 62 (19.9%)    | 1.08 (0.80–1.47)       | 1.7% (−4.7–8.0)     | .6105   |
| Aneurysm neck (mm)                   | 3.7 ± 1.6     | 3.6 ± 1.5     | NA                     | 0.1 (−0.1–0.3)      | .4063   |
| Aneurysm neck ≥4 mm                  | 118 (37.5%)   | 110 (35.4%)   | 1.06 (0.86–1.30)       | 2.1% (−5.4–9.6)     | .5868   |
| Wide-neck aneurysm <sup>c</sup>      | 264 (83.8%)   | 245 (78.8%)   | 1.06 (0.99–1.15)       | 5.0% (−1.1–11.1)    | .1064   |
| Parent artery vessel diameter (mm)   | 3.0 ± 1.0     | 3.0 ± 0.9     | NA                     | 0.0 (−0.1–0.2)      | .7113   |
| Aneurysm volume (mm <sup>3</sup> )   | 222.0 ± 328.9 | 207.3 ± 348.1 | NA                     | 14.6 (−38.5–67.7)   | .5900   |
| Plan to use adjunctive devices (yes) | 145 (46.0%)   | 147 (47.3%)   | 0.97 (0.82–1.15)       | −1.2 (−9.1–6.6)     | .7568   |
| Neuroform stent                      | 76 (52.4%)    | 78 (53.1%)    | 0.99 (0.79–1.23)       | −0.6% (−12.1–10.8)  | .9118   |
| Other                                | 73 (50.3%)    | 78 (53.1%)    | 0.95 (0.76–1.18)       | −2.7 (−14.2–8.7)    | .6423   |

**Note:**—AP indicates anteroposterior; PMC, polymer-modified coils.

<sup>a</sup> Values are presented as mean ± SD for continuous variables and No. (%) for categorical variables. The denominator used for rates (%) can be smaller than the number of subjects in each group due to missing values.

<sup>b</sup> Aneurysm size was the maximum length among the width on the AP plane, the width on the lateral plane, and height.

<sup>c</sup> Neck size ≥ 4 mm or dome-to-neck ratio of <2, with the dome size calculated as a minimum of the 2 widths (AP plane, lateral plane).

<sup>d</sup> Aneurysm volume was calculated by statisticians at the Stryker Corporation (Michigan), using the site-reported measurements, based on the equation below:

Aneurysm Volume = (4 / 3) × 3.141593 × (Width on AP Plane / 2) × (Width on Lateral Plane / 2) × (Height / 2).

**On-line Table 3. Procedural characteristics of target aneurysms<sup>a</sup>**

|                                                                | BMC (n = 315) | PMC (n = 311) | Relative Risk (95% CI) | Difference (95% CI) | P Value |
|----------------------------------------------------------------|---------------|---------------|------------------------|---------------------|---------|
| Procedure time (min)                                           | 122.3 ± 71.5  | 120.4 ± 60.8  | NA                     | 1.9 (−8.5–12.3)     | .7246   |
| Packing density (%) <sup>b</sup> (coil volume/aneurysm volume) | 23.3 ± 11.7   | 26.4 ± 11.7   | NA                     | −3.1 (−4.9–−1.2)    | .0013   |
| No. of coils implanted/patient <sup>b</sup>                    | 6.9 ± 5.2     | 5.5 ± 4.3     | NA                     | 1.4 (0.6–2.1)       | .0003   |
| Use of Neuroform stent                                         | 73 (23.2%)    | 72 (23.2%)    | 1.00 (0.75–1.33)       | 0.0% (−6.6–6.6)     | .9944   |
| Technical success                                              | 307 (97.5%)   | 301 (96.8%)   | 1.01 (0.98–1.03)       | 0.7% (−1.9–3.3)     | .6130   |
| If no, failure due to inability to access the target aneurysm  | 3 (42.9%)     | 5 (50.0%)     | 0.86 (0.30–2.46)       | −7.1% (−55.1–40.9)  | >.9999  |
| Device malfunction                                             | 12 (3.9%)     | 12 (3.9%)     | 1.00 (0.46–2.20)       | 0.0% (−3.0–3.1)     | .9935   |
| Product nonconformity                                          | 3 (1.0%)      | 4 (1.3%)      | 0.75 (0.17–3.34)       | −0.3% (−2.0–1.4)    | >.9999  |
| AEs during procedure                                           | 47 (15.0%)    | 46 (14.8%)    | 1.02 (0.70–1.48)       | 0.2% (−5.4–5.8)     | .9371   |

**Note:**—AEs indicates adverse events; NA, not applicable; PMC, polymer-modified coils.

<sup>a</sup> Values are presented as mean ± SD for continuous variables and No. (%) for categorical variables. The denominator used for rates (%) can be smaller than the number of subjects in each group due to missing values.

<sup>b</sup> Only coils successfully implanted were included in the calculation.

**On-line Table 4. Subgroup analysis of TAR<sup>a</sup>**

|                                 | BMC            | PMC            | Relative Risk (95% CI) | Difference (95% CI) | P Value |
|---------------------------------|----------------|----------------|------------------------|---------------------|---------|
| Aneurysm size <sup>b</sup>      |                |                |                        |                     |         |
| <10 mm                          | 7.7% (19/247)  | 8.8% (22/249)  | 0.87 (0.48–1.57)       | −1.1% (−6.0–3.7)    | .6439   |
| 10–20 mm                        | 23.5% (16/68)  | 19.4% (12/62)  | 1.22 (0.63–2.36)       | 4.2% (−9.9–18.3)    | .5631   |
| Neck size                       |                |                |                        |                     |         |
| <4 mm                           | 7.6% (15/197)  | 7.0% (14/201)  | 1.09 (0.54–2.20)       | 0.6% (−4.5–5.8)     | .8033   |
| ≥4 mm                           | 16.9% (20/118) | 18.2% (20/110) | 0.93 (0.53–1.64)       | −1.2% (−11.1–8.7)   | .8068   |
| Dome-to-neck ratio <sup>c</sup> |                |                |                        |                     |         |
| <2                              | 10.4% (26/251) | 10.2% (24/235) | 1.01 (0.60–1.72)       | 0.1% (−5.3–5.5)     | .9578   |
| ≥2                              | 14.1% (9/64)   | 13.2% (10/76)  | 1.07 (0.46–2.47)       | 0.9% (−10.5–12.3)   | .8763   |
| Wide/non-wide-neck              |                |                |                        |                     |         |
| Wide-neck <sup>d</sup>          | 11.7% (31/264) | 11.0% (27/245) | 1.07 (0.66–1.73)       | 0.7% (−4.8–6.2)     | .7978   |
| Non-wide-neck                   | 7.8% (4/51)    | 10.6% (7/66)   | 0.74 (0.23–2.39)       | −2.8% (−13.2–7.7)   | .7540   |
| Rupture status                  |                |                |                        |                     |         |
| Ruptured aneurysm               | 14.3% (17/119) | 13.8% (15/109) | 1.04 (0.55–1.98)       | 0.5% (−8.5–9.5)     | .9094   |
| Unruptured aneurysm             | 9.2% (18/196)  | 9.4% (19/202)  | 0.98 (0.53–1.80)       | −0.2% (−5.9–5.5)    | .9391   |

**Note:**—AP indicates anteroposterior; PMC, polymer-modified coils.

<sup>a</sup> Values are presented as % (x/N).

<sup>b</sup> Aneurysm size was the maximum length among the width on the AP plane, the width on lateral plane, and height.

<sup>c</sup> Dome size was calculated as a minimum of the 2 widths (AP plane-lateral plane).

<sup>d</sup> Neck size ≥ 4 mm or dome-to-neck ratio < 2, with the dome size calculated as a minimum of the 2 widths.

**On-line Table 5: Clinical Events Committee–adjudicated safety events<sup>a</sup>**

| Event                                          | BMC (n = 315) | Matrix <sup>2</sup> (n = 311) | Relative Risk (95% CI) | Difference (95% CI) | P Value |
|------------------------------------------------|---------------|-------------------------------|------------------------|---------------------|---------|
| Ischemic Stroke                                |               |                               |                        |                     |         |
| Periprocedural                                 | 12 (3.8%)     | 9 (2.9%)                      | 1.32 (0.56–3.08)       | 0.9% (–1.9–3.7)     | .5247   |
| 30-Day                                         | 16 (5.1%)     | 15 (4.8%)                     | 1.05 (0.53–2.09)       | 0.3% (–3.1–3.7)     | .8826   |
| 455-Day                                        | 21 (6.7%)     | 17 (5.5%)                     | 1.22 (0.66–2.27)       | 1.2% (–2.5–4.9)     | .5294   |
| Hemorrhagic stroke <sup>b</sup>                |               |                               |                        |                     |         |
| Periprocedural                                 | 3 (1.0%)      | 4 (1.3%)                      | 0.74 (0.17–3.28)       | –0.3% (–2.0–1.3)    | .7235   |
| 30-Day                                         | 3 (1.0%)      | 5 (1.6%)                      | 0.59 (0.14–2.46)       | –0.7% (–2.4–1.1)    | .5026   |
| 455-Day                                        | 4 (1.3%)      | 7 (2.3%)                      | 0.56 (0.17–1.91)       | –1.0% (–3.0–1.1)    | .3503   |
| Target aneurysm rupture/rerupture <sup>c</sup> |               |                               |                        |                     |         |
| Periprocedural                                 | 1 (0.3%)      | 1 (0.3%)                      | 0.99 (0.06–15.71)      | 0.0% (–0.9–0.9)     | >.9999  |
| 30-Day                                         | 2 (0.6%)      | 1 (0.3%)                      | 1.97 (0.18–21.67)      | 0.3% (–0.8–1.4)     | >.9999  |
| 455-Day                                        | 2 (0.6%)      | 2 (0.6%)                      | 0.99 (0.14–6.97)       | 0.0% (–1.3–1.2)     | >.9999  |
| All causes of death                            |               |                               |                        |                     |         |
| Periprocedural                                 | 0 (0.0%)      | 1 (0.3%)                      | 0.00 (undef-undef)     | –0.3% (–1.0–0.3)    | .4968   |
| 30-day                                         | 3 (1.0%)      | 12 (3.9%)                     | 0.25 (0.07–0.87)       | –2.9% (–5.3––0.5)   | .0174   |
| 455-day                                        | 9 (2.9%)      | 15 (4.8%)                     | 0.59 (0.26–1.33)       | –2.0% (–5.0–1.0)    | .2002   |
| Neurologic death <sup>d</sup>                  |               |                               |                        |                     |         |
| Periprocedural                                 | 0 (0.0%)      | 1 (0.3%)                      | 0.00 (undef-undef)     | –0.3% (–1.0–0.3)    | .4968   |
| 30-Day                                         | 1 (0.3%)      | 11 (3.5%)                     | 0.09 (0.01–0.69)       | –3.2% (5.4–1.1)     | .0033   |
| 455-Day                                        | 1 (0.3%)      | 13 (4.2%)                     | 0.08 (0.01–0.58)       | –3.9% (–6.2––1.6)   | .0011   |
| Non-neurologic death                           |               |                               |                        |                     |         |
| Periprocedural                                 | 0 (0.0%)      | 0 (0.0%)                      | undef (undef-undef)    | 0.0% (NA-NA)        | >.9999  |
| 30-Day                                         | 2 (0.6%)      | 1 (0.3%)                      | 1.97 (0.18–21.67)      | 0.3% (–0.8–1.4)     | >.9999  |
| 455-Day                                        | 8 (2.5%)      | 2 (0.6%)                      | 3.95 (0.85–18.45)      | 1.9% (–0.1–3.8)     | .1066   |

**Note:**—undef indicates undefined.

<sup>a</sup> Values are presented as mean ± SD for continuous variables and No. (%) for categoric variables. The denominator used for rates (%) can be smaller than the number of subjects in each group due to missing values.

<sup>b</sup> Hemorrhagic strokes due to rupture/rerupture are not included.

<sup>c</sup> Target aneurysm rupture excludes those that occurred during the index procedure.

<sup>d</sup> One unknown death is included in the neurologic death.
